# Supplementary material for: An Unusual Piceatannol Dimer from Rheum austral D. Don with Antioxidant Activity
Source: PubMed Central journal article supplement (PMC6271410; doi:10.3390/molecules190811453), 2014-08-04

# Supplementary Materials

Figure S1.  $^1\text{H-NMR}$  spectrum (500M Hz,  $\text{CD}_3\text{OD}$ ) of rheumaustralin.

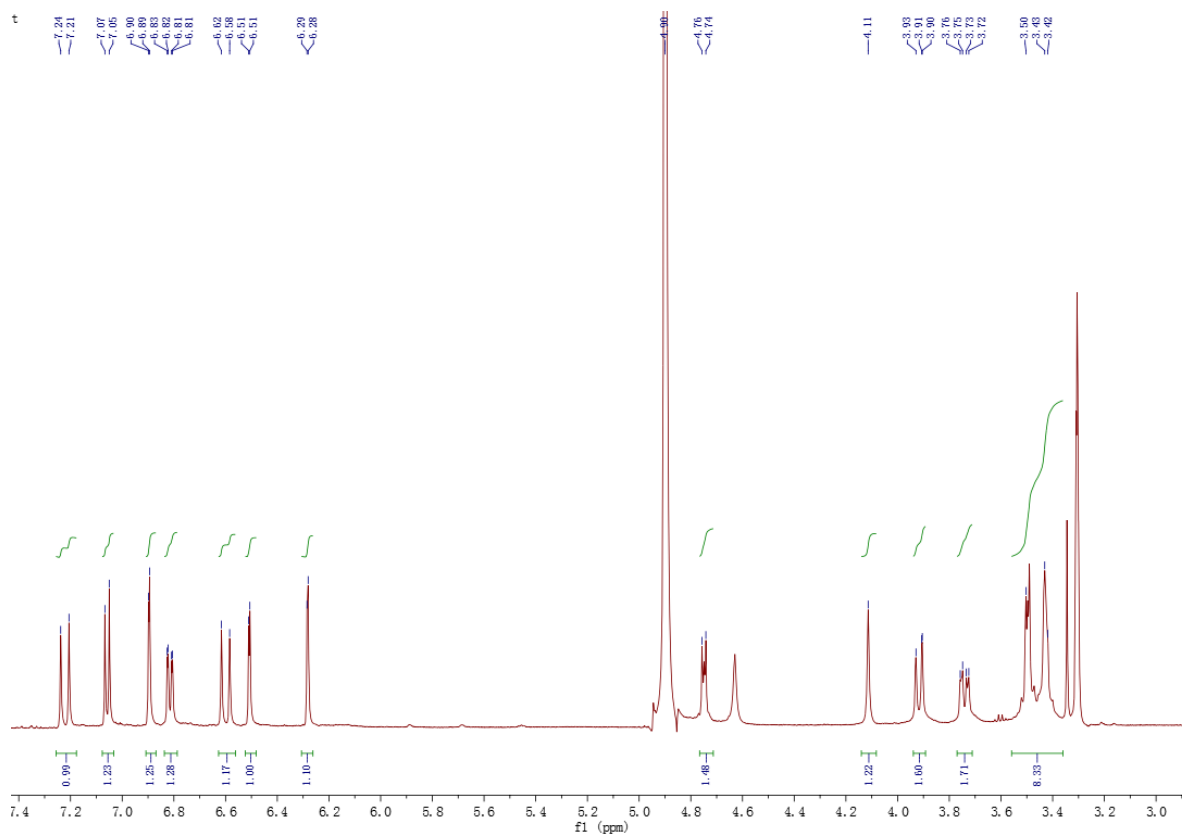

Figure S2.  $^{13}\text{C-NMR}$  (DEPT) spectrum (125M Hz,  $\text{CD}_3\text{OD}$ ) of rheumaustralin.

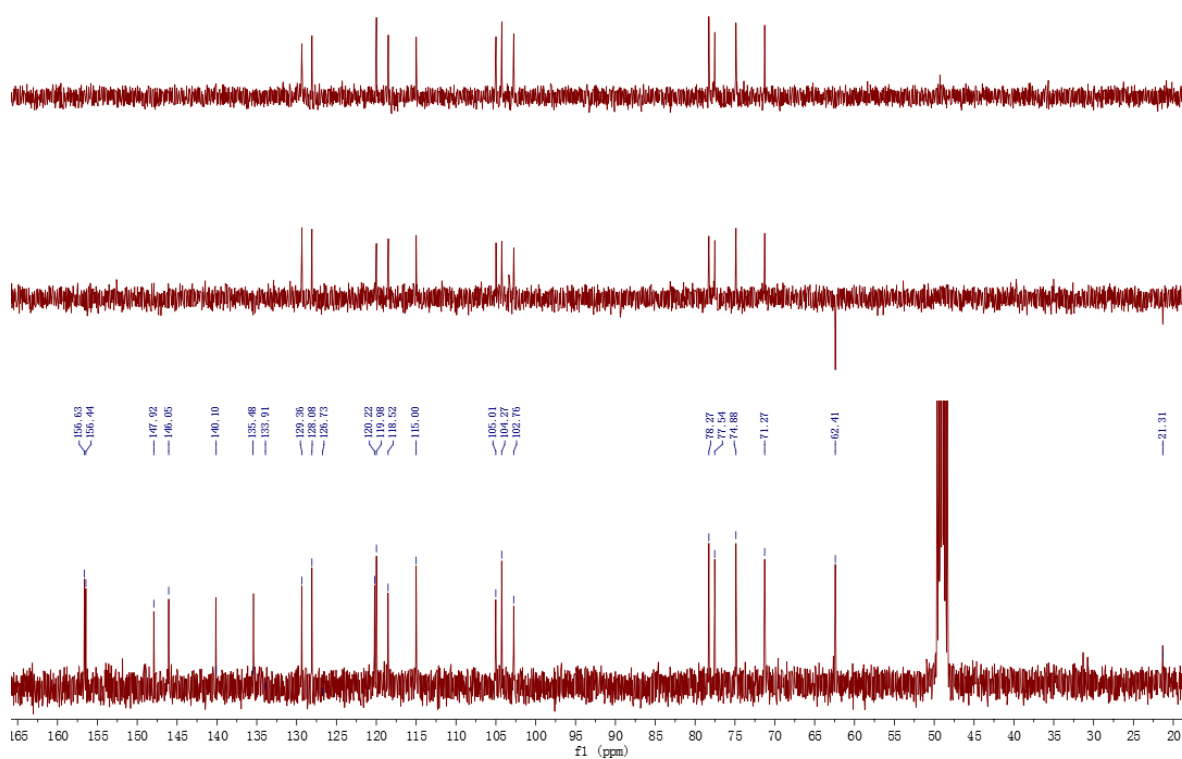

**Figure S3.** Detailed  $^{13}\text{C}$ -NMR (DEPT) spectrum ( $\delta$  ppm 170–110) of rheumaustralin.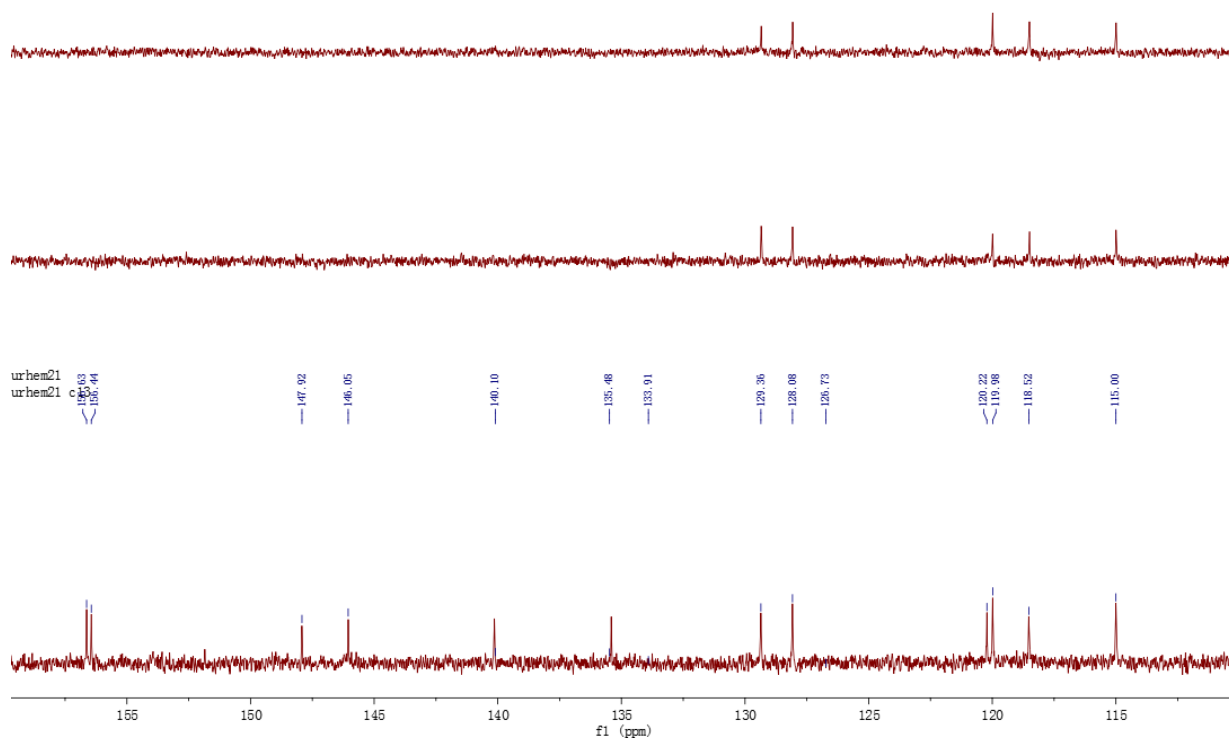**Figure S4.** HSQC spectrum (500M Hz,  $\text{CD}_3\text{OD}$ ) of rheumaustralin.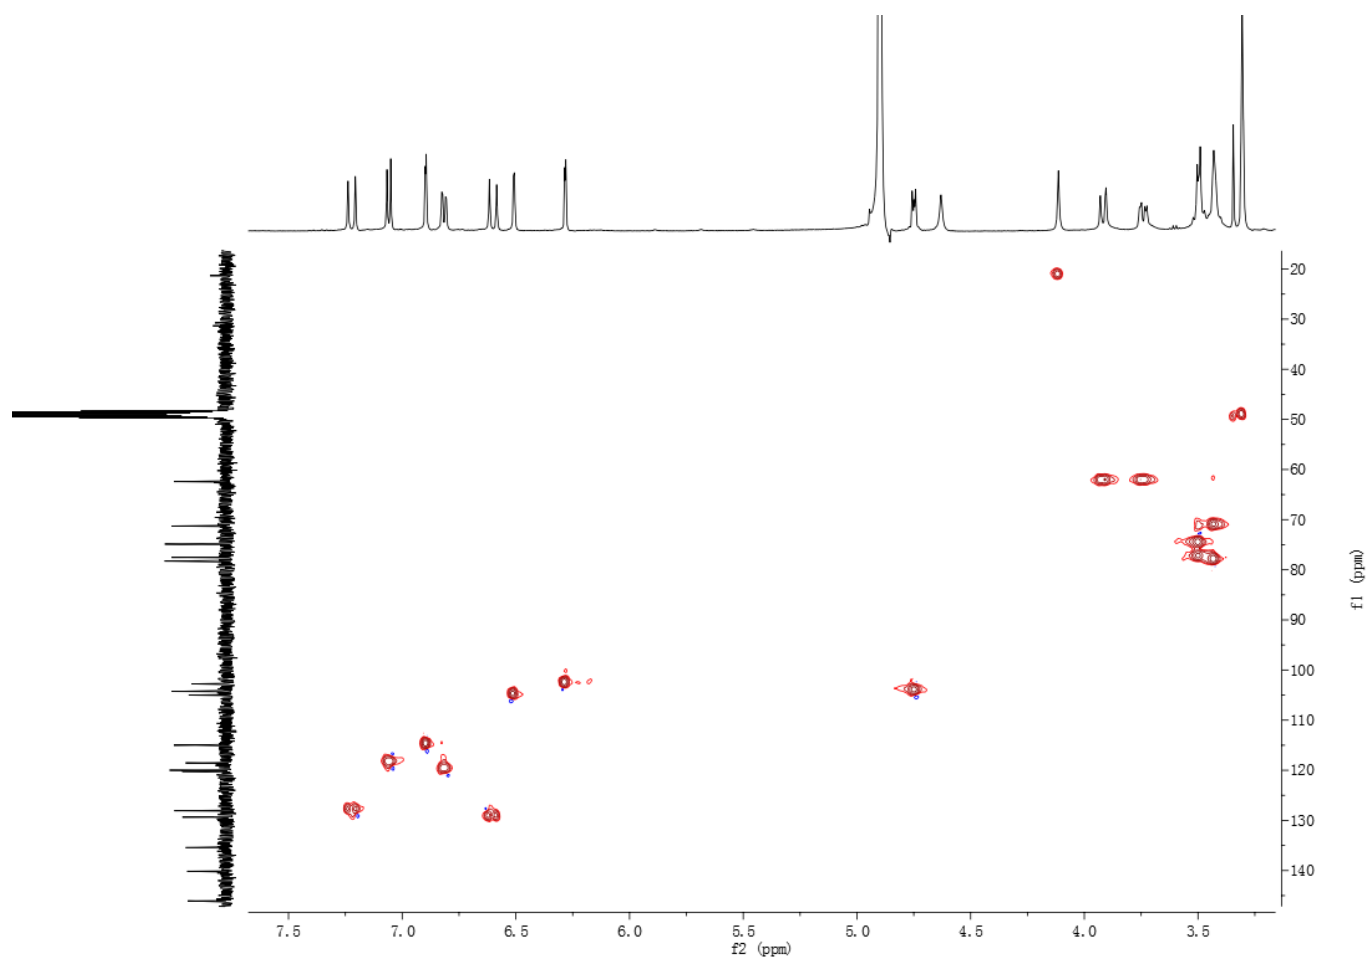

Figure S5. HMBC spectrum (500M Hz, CD<sub>3</sub>OD) of rheumaustralin.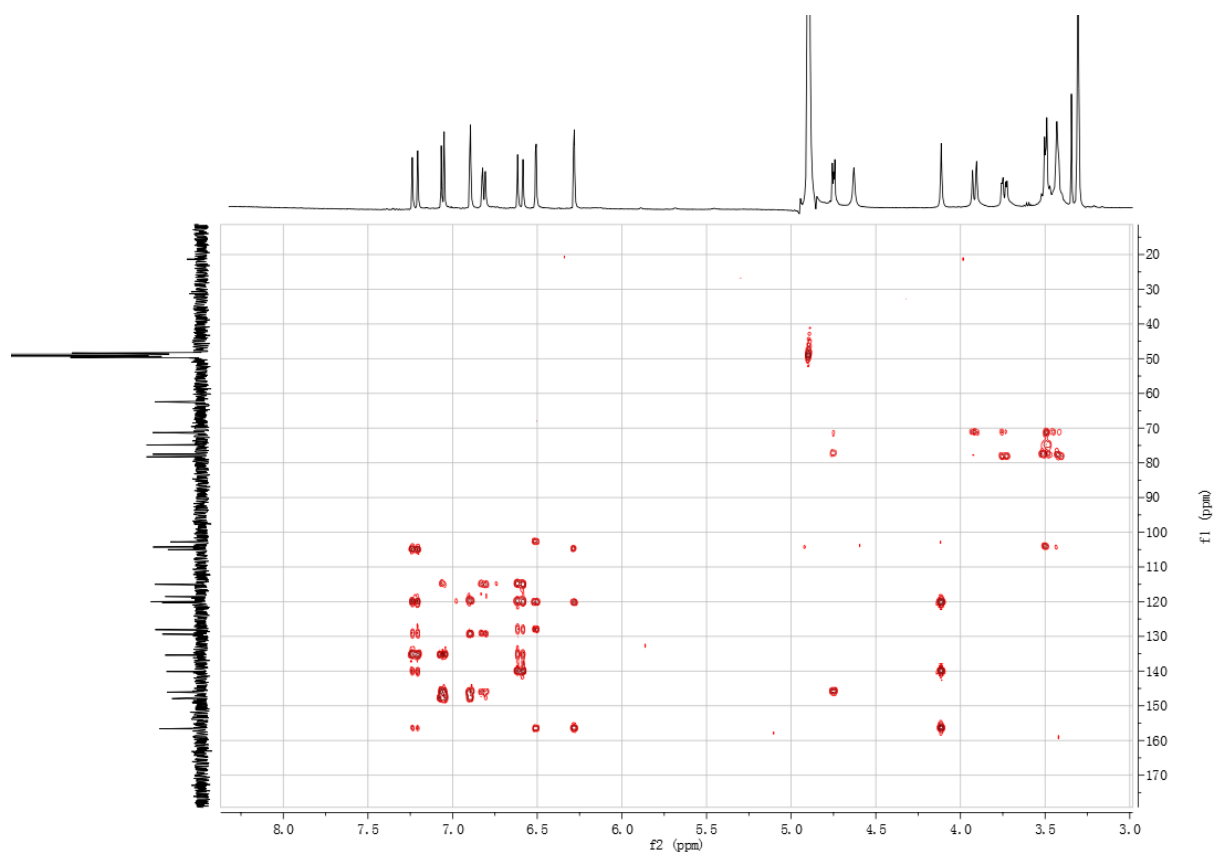Figure S6. Detailed HMBC spectrum ( $\delta_{\text{H}}$  ppm 4.00–6.16;  $\delta_{\text{C}}$  ppm 165–110) of rheumaustralin.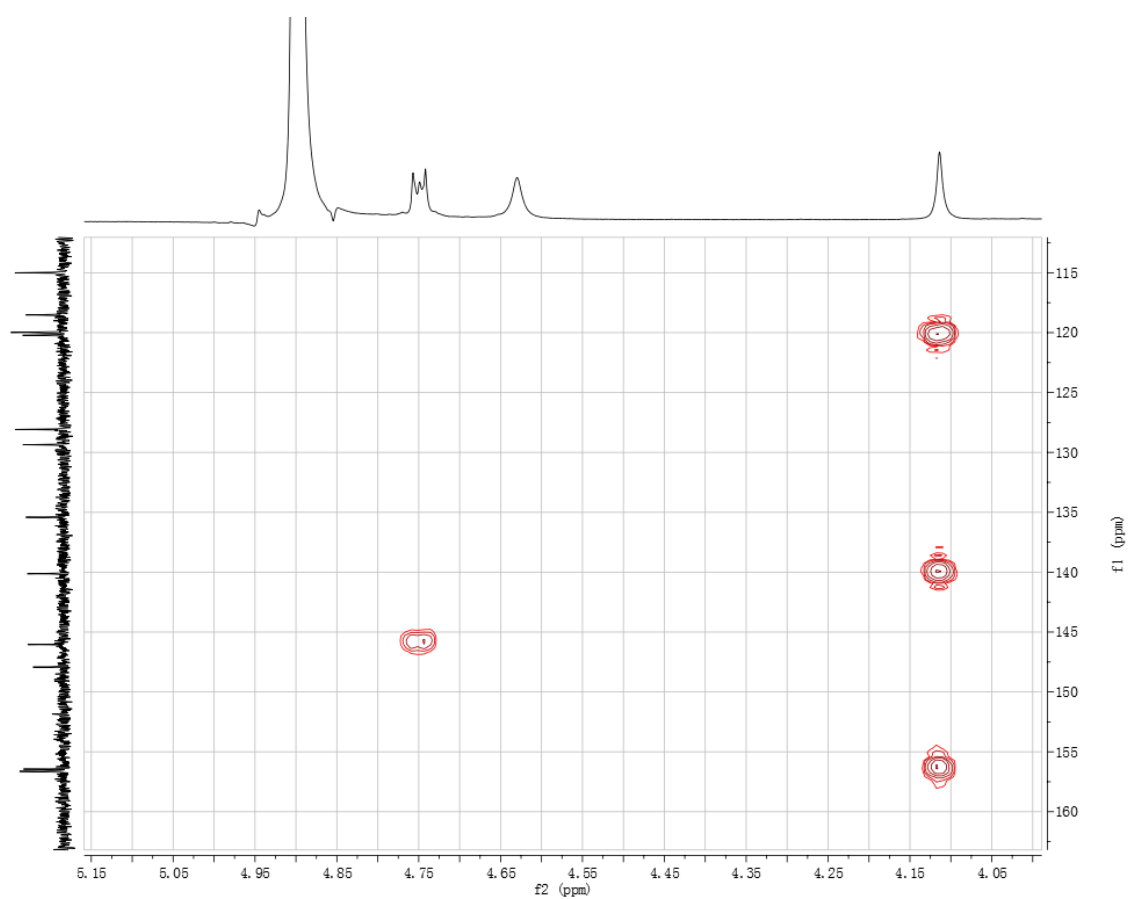

Supplement: molecules-19-11453-s001.pdf [file molecules-19-11453-s001.pdf]
